# Supplementary material
Source: PubMed Central journal article supplement (PMC11462533)
Supplement: JTCM-44-5-859-s1.pdf [file JTCM-44-5-859-s1.pdf]

## Supplementary File 1 The specific search strategy for each database

### Medline

1. cerebral infarction/ OR cerebral ischemia/ OR ischemic stroke/ OR ischemic infarction/ OR ischaemic stroke/ OR ischaemic infarction/ OR cerebral ischaemia/ OR cerebral ischaemia/reperfusion OR Cerebral Ischemia-Reperfusion/ OR Cerebral ischemia/reperfusion injury/cerebrovascular disorders/ OR basal ganglia cerebrovascular disease/ OR brain ischemia/ OR carotid artery diseases/ OR carotid artery thrombosis/ OR cerebrovascular accident/ OR exp brain infarction/ OR exp hypoxia-ischemia, brain/ OR cerebral arterial diseases/ OR exp "intracranial embolism and thrombosis"/
2. ((brain or cerebr\$ or cerebell\$ or vertebrobasil\$ or hemispher\$ or intracran\$ or intracerebral or infratentorial or supratentorial or middle cerebr\$ or mca\$ or anterior circulation) adj5 (isch?emi\$ or infarct\$ or thrombo\$ or emboli\$ or oclus\$ or hypoxi\$)).tw.
3. (isch?emi\$ adj6 (stroke\$ or apoplex\$ or cerebral vasc\$ or cerebrovasc\$ or cva or attack\$)).tw.
4. 1 or 2 or 3
5. acupuncture/ or acupuncture therapy/ or acupuncture analgesia/ or acupuncture, ear/ or electroacupuncture/ or meridians/ or acupuncture points/ or trigger points/
6. (acupuncture\$ or electroacupuncture or electro-acupuncture or acupoint\$ or meridians or needling).tw.
7. ((meridian or non-meridian or trigger) adj10 point\$).tw.
8. 5 or 6 or 7
9. exp Neuronal Plasticity/ or exp neurogenesis/
10. (Neural Plasticity or Plasticity, Neuronal or Neuronal Plasticities or Plasticities, Neuronal or Synaptic Plasticity or Plasticities, Synaptic or Plasticity, Synaptic or Synaptic Plasticities or Neuroplasticity or Neuroplasticities or Neural Plasticity or Neural Plasticities or Plasticities, Neural or Plasticity, Neural or Dendritic Arborization or Neuronal Arborization or Synaptic Pruning\$ or Neuronal Pruning or Dendritic Pruning or Axon Pruning\$ or Pruning, Axon or Neuronal Remodeling\$ or Neuronal Network Remodeling\$ or Network Remodeling, Neuronal or Remodeling\$, Neuronal Network or neurogenesis or neural regeneration or neurotization or "New neurons" or neurotrophin or neurotrophic factor or neurotransmitter or "NTFs" or "BDNF" or "VEGF" or "NT-3" or "NT-4" or "NT-5" or "GDNF" or "bFGF" or "EGF" or "p75NTR").mp.
11. 9 or 10
12. 4 and 8 and 11

### Embase

1. cerebrovascular disorders/ or basal ganglia cerebrovascular disease/ or brain ischemia/ or carotid artery diseases/ or carotid artery thrombosis/ or cerebrovascular accident/ or exp brain

infarction/ or exp hypoxia-ischemia, brain/ or cerebral arterial diseases/ or exp "intracranial embolism and thrombosis"/

2. ((brain or cerebr\$ or cerebell\$ or vertebrobasil\$ or hemispher\$ or intracran\$ or intracerebral or infratentorial or supratentorial or middle cerebr\$ or mca\$ or anterior circulation) adj5 (isch?emi\$ or infarct\$ or thrombo\$ or emboli\$ or occlus\$ or hypoxi\$)).tw.

3. (isch?emi\$ adj6 (stroke\$ or apoplex\$ or cerebral vasc\$ or cerebrovasc\$ or cva or attack\$)).tw.

4. 1 or 2 or 3

5. acupuncture/ or acupuncture therapy/ or acupuncture analgesia/ or acupuncture, ear/ or electroacupuncture/ or meridians/ or acupuncture points/ or trigger points/

6. (acupuncture\$ or electroacupuncture or electro-acupuncture or acupoint\$ or meridians or needling).tw.

7. ((meridian or non-meridian or trigger) adj10 point\$).tw.

8. 5 or 6 or 7

9. exp Neuronal Plasticity/ or exp neurogenesis/

10. (Neural Plasticity or Plasticity, Neuronal or Neuronal Plasticities or Plasticities, Neuronal or Synaptic Plasticity or Plasticities, Synaptic or Plasticity, Synaptic or Synaptic Plasticities or Neuroplasticity or Neuroplasticities or Neural Plasticity or Neural Plasticities or Plasticities, Neural or Plasticity, Neural or Dendritic Arborization or Neuronal Arborization or Synaptic Pruning\$ or Neuronal Pruning or Dendritic Pruning or Axon Pruning\$ or Pruning, Axon or Neuronal Remodeling\$ or Neuronal Network Remodeling\$ or Network Remodeling, Neuronal or Remodeling\$, Neuronal Network or neurogenesis or neural regeneration or neurotization or "New neurons" or neurotrophin or neurotrophic factor or neurotransmitter or "NTFs" or "BDNF" or "VEGF" or "NT-3" or "NT-4" or "NT-5" or "GDNF" or "bFGF" or "EGF" or "p75NTR").mp.

11. 9 or 10

12. 4 and 8 and 11

Cochrane library

#1 MeSH descriptor: [Brain Ischemia] explode all trees

#2 (isch\*mi\* near/6 (stroke\* or apoplex\* or cerebral next vasc\* or cerebrovasc\* or cva or attack\*)):ti,ab,kw (Word variations have been searched)

#3 ((brain or cerebr\* or cerebell\* or vertebrobasil\* or hemispher\* or intracran\* or intracerebral or infratentorial or supratentorial or middle next cerebr\* or mca\* or "anterior circulation") near/5 (isch\*mi\* or infarct\* or thrombo\* or emboli\* or occlus\* or hypoxi\*)):ti,ab,kw (Word variations have been searched)

#4 #1 or #2 or #3

#5 MeSH descriptor: [Acupuncture] explode all trees

#6 ((acupuncture or acupuncture therapy or acupuncture analgesia or acupuncture, ear or electroacupuncture or meridians or acupuncture points or trigger points)):ti,ab,kw (Word variations

have been searched)

#7 ((acupuncture\* or electroacupuncture or "electro-acupuncture" or acupoint\* or meridians or needling)):ti,ab,kw (Word variations have been searched)

#8 (((meridian or non-meridian or trigger) near/10 point\*)):ti,ab,kw (Word variations have been searched)

#9 #5 or #6 or #7 or #8

#10 MeSH descriptor: [Neuronal Plasticity] explode all trees

#11 MeSH descriptor: [Neurogenesis] explode all trees

#12 (Neural Plasticity or Plasticity, Neuronal or Neuronal Plasticities or Plasticities, Neuronal or Synaptic Plasticity or Plasticities, Synaptic or Plasticity, Synaptic or Synaptic Plasticities or Neuroplasticity or Neuroplasticities or Neural Plasticity or Neural Plasticities or Plasticities, Neural or Plasticity, Neural or Dendritic Arborization or Neuronal Arborization or Synaptic Pruning\$ or Neuronal Pruning or Dendritic Pruning or Axon Pruning\$ or Pruning, Axon or Neuronal Remodeling\$ or Neuronal Network Remodeling\$ or Network Remodeling, Neuronal or Remodeling\$, Neuronal Network or neurogenesis or neural regeneration or neurotization or "New neurons" or neurotrophin or neurotrophic factor or neurotransmitter or "NTFs" or "BDNF" or "VEGF" or "NT-3" or "NT-4" or "NT-5" or "GDNF" or "bFGF" or "EGF" or "p75NTR")

#13 #10 or #11 or #12

#14 #4 and #9 and #13

CNKI

(SU='中风' OR SU='卒中' OR SU='脑梗死' OR SU='脑梗塞' OR SU='脑栓塞' OR SU='脑缺血' OR SU='脑缺血再灌注' OR SU='脑血管') AND (SU='针灸' OR SU='针刺' OR SU='电针' OR SU='头针' OR SU='毫针' OR SU='火针' OR SU='皮内针' OR SU='耳针' OR SU='针法' OR SU='圆利针' OR SU='手捻针' OR SU='头皮针' OR SU='穴位' OR SU='体针' OR SU='温针' OR SU='长针' OR SU='巨针' OR SU='锋针' OR SU='铍针' OR SU='大针') AND (SU='神经可塑性' OR SU='脑可塑性' OR SU='突触可塑性' OR SU='神经再生' OR SU='再生' OR SU='突触再生' OR SU='轴突再生' OR SU='神经网络再生' OR SU='神经生长因子' OR SU='神经递质' OR SU='NTFs' OR SU='BDNF' OR SU='VEGF' OR SU='NT-3' OR SU='NT-4' OR SU='GDNF' OR SU='bFGF' OR SU='EGF' OR SU='p75NTR')

VIP

(U=中风+U=卒中+U=脑血管+U=脑梗塞+U=脑梗死+U=脑血栓+U=脑栓塞+U=脑血管+U=脑缺血+U=脑缺血再灌注)\* (U=针灸+U=针刺+U=电针+U=针法+U=刺法+U=头针+U=火针+U=温针+U=体针+U=毫针)\* (U=神经可塑性+U=脑可塑性+U=突触可塑性+U=神经再生+U=再生+U=突触再生+U=轴突再生+U=神经网络再生+U=神经生长因子+U=神经递质+U="NTFs"+U="BDNF"+U="VEGF"+U="NT-3"+U="NT-4"+U="GDNF"+U="bFGF"+U="EGF"+U="p75NTR")

### Wangfang

(中风 OR 卒中 OR 脑血管 OR 脑梗塞 OR 脑梗死 OR 脑栓塞 OR 脑缺血 OR 脑缺血再灌注)  
And (针灸 OR 针刺 OR 电针 OR 芒针 OR 皮下针 OR 火针 OR 头针 OR 手捻针 OR 长针 OR  
巨针 OR 头皮针 OR 体针 OR 温针 OR 毫针 OR 皮内针 OR 园针 OR 锋针 OR 铍针 OR 圆利  
针 OR 大针) And (神经可塑性 OR 脑可塑性 OR 突触可塑性 OR 神经再生 OR 再生 OR 突触  
再生 OR 轴突再生 OR 神经网络再生 OR 神经生长因子 OR 神经递质 OR "NTFs" OR "BDNF"  
OR "VEGF" OR "NT-3" OR "NT-4" OR "GDNF" OR "bFGF" OR "EGF" OR "p75NTR")

### CBM

(中风 OR 卒中 OR 脑血管 OR 脑梗塞 OR 脑梗死 OR 脑栓塞 OR 脑缺血 OR 脑缺血再灌注)  
And (针灸 OR 针刺 OR 电针 OR 芒针 OR 皮下针 OR 火针 OR 头针 OR 手捻针 OR 长针 OR  
巨针 OR 头皮针 OR 体针 OR 温针 OR 毫针 OR 皮内针 OR 园针 OR 锋针 OR 铍针 OR 圆利  
针 OR 大针) And (神经可塑性 OR 脑可塑性 OR 突触可塑性 OR 神经再生 OR 再生 OR 突触  
再生 OR 轴突再生 OR 神经网络再生 OR 神经生长因子 OR 神经递质 OR "NTFs" OR "BDNF"  
OR "VEGF" OR "NT-3" OR "NT-4" OR "GDNF" OR "bFGF" OR "EGF" OR "p75NTR")

**Supplementary Table 1 Characteristics of the included studies**

| Author                          | Year    | diagnose          | Species     | Sex | Anesthetic              | Intervention | Control | Outcome     | Treatment time | Animal modeling        |
|---------------------------------|---------|-------------------|-------------|-----|-------------------------|--------------|---------|-------------|----------------|------------------------|
| Chen YH, Huang XF <sup>72</sup> | 2000(1) | cerebral ischemia | Wistar rats | M   | 10%chloral hydrate      | EA           | rol     | BDNF        | 7 d            | suture-occluded method |
| Cao XL et al <sup>16</sup>      | 2018    | cerebral ischemia | SD rats     | M   | 10%chloral hydrate      | EA           | rol     | GAP-43      | 14 d           | suture-occluded method |
| Cao XL et al <sup>16</sup>      | 2018    | cerebral ischemia | SD rats     | M   | 10%chloral hydrate      | EA           | rol     | GAP--43mRNA | 7 d            | suture-occluded method |
| Ding J et al <sup>74</sup>      | 2018    | cerebral ischemia | SD rats     | M   | sodium pentobarbital    | EA           | rol     | NGF         | 21 d           | suture-occluded method |
| Duan XD et al <sup>75</sup>     | 2018    | cerebral ischemia | SPF rats    | M   | 1% pentobarbital sodium | EA           | rol     | NGF         | 14 d           | suture-occluded method |
| Duan XD et al <sup>75</sup>     | 2018    | cerebral ischemia | SPF rats    | M   | 1% pentobarbital sodium | EA           | rol     | BDNF        | 14 d           | suture-occluded method |
| Liu L, Zhang XQ <sup>78</sup>   | 2018    | cerebral ischemia | SD rats     | M   | 10%chloral hydrate      | EA           | rol     | NGF         | 7 d            | suture-occluded method |
| Li QL et al <sup>56</sup>       | 2018    | cerebral ischemia | SPF rats    | M   | 3.5%chloral hydrate     | EA           | rol     | VEGF        | 7 d            | suture-occluded method |
| Li QL et al <sup>56</sup>       | 2018    | cerebral ischemia | SPF rats    | M   | 3.5%chloral hydrate     | EA           | rol     | VEGFmR-NA   | 7 d            | suture-occluded method |
| Ma Y et al <sup>81</sup>        | 2018    | cerebral ischemia | Wistar rats | H   | 10%chloral hydrate      | EA           | rol     | NGF         | 7 d            | suture-occluded method |
| Song CM <sup>28</sup>           | 2018    | cerebral ischemia | SD rats     | M   | 10%chloral hydrate      | EA           | rol     | SYN         | 8 d            | suture-occluded method |

|                             |      |                   |             |   |                        |    |     |           |      |                        |
|-----------------------------|------|-------------------|-------------|---|------------------------|----|-----|-----------|------|------------------------|
|                             |      |                   |             |   |                        |    |     |           |      | suture-                |
| Tan F et al <sup>44</sup>   | 2018 | cerebral ischemia | SD rats     | M | 5%isoflurane           | EA | rol | Nestin    | 7 d  | method occluded        |
| Wang MP et al <sup>67</sup> | 2018 | cerebral ischemia | Wistar rats | M | 10%chloral hydrate     | EA | rol | VEGFmR-NA | 7 d  | suture-occluded method |
| Wang S et al <sup>104</sup> | 2018 | cerebral ischemia | SD rats     | M | NR                     | EA | rol | BDNF      | 14 d | suture-occluded method |
| Yang MG et al <sup>29</sup> | 2018 | cerebral ischemia | SPF rats    | M | 10%chloral hydrate     | EA | rol | SYN       | 7 d  | suture-occluded method |
| Zhao HJ et al <sup>39</sup> | 2018 | cerebral ischemia | Wistar rats | M | 10%chloral hydrate     | EA | rol | GFAP      | 14 d | suture-occluded method |
| Ding J et al <sup>73</sup>  | 2017 | cerebral ischemia | SD rats     | M | 1%sodium pentobarbital | EA | rol | NGF       | 21 d | suture-occluded method |
| Lin R et al <sup>33</sup>   | 2017 | cerebral ischemia | SD rats     | M | 10%chloral hydrate     | EA | rol | BDNF      | 7 d  | suture-occluded method |
| Lin R et al <sup>33</sup>   | 2017 | cerebral ischemia | SD rats     | M | 10%chloral hydrate     | EA | rol | PSD-95    | 7 d  | suture-occluded method |
| Lin XM et al <sup>26</sup>  | 2017 | cerebral ischemia | SPF rats    | M | 10%chloral hydrate     | EA | rol | PSD-95    | 7 d  | suture-occluded method |
| Lin XM et al <sup>26</sup>  | 2017 | cerebral ischemia | SPF rats    | M | 10%chloral hydrate     | EA | rol | SYN       | 7 d  | suture-occluded method |
| Tan F et al <sup>55</sup>   | 2017 | cerebral ischemia | SD rats     | M | 10%chloral hydrate     | EA | rol | GFAP      | 14 d | suture-occluded method |
| Zhao JP et al <sup>30</sup> | 2017 | cerebral ischemia | SPF rats    | M | 10%chloral hydrate     | EA | rol | BDNF      | 14 d | suture-occluded method |

|                             |      |                   |                 |   |                    |    |     |           |      |        |                      |
|-----------------------------|------|-------------------|-----------------|---|--------------------|----|-----|-----------|------|--------|----------------------|
| Zhao JP et al <sup>50</sup> | 2017 | cerebral ischemia | SPF rats        | M | 10%chloral hydrate | EA | rol | BDNFmR-NA | 14 d | method | suture-occluded      |
| Zhao JP et al <sup>50</sup> | 2017 | cerebral ischemia | SPF rats        | M | 10%chloral hydrate | EA | rol | SYN       | 7 d  | method | suture-occluded      |
| Zheng CX <sup>108</sup>     | 2017 | cerebral ischemia | SPF rats        | M | 10%chloral hydrate | EA | rol | BDNF      | 21 d | method | two-vessel occlusion |
| Li T <sup>32</sup>          | 2016 | cerebral ischemia | SPF rats        | M | 10%chloral hydrate | EA | rol | PSD-95    | 21 d | method | suture-occluded      |
| Lv H <sup>43</sup>          | 2016 | cerebral ischemia | SPF wistar rats | M | 10%chloral hydrate | EA | rol | Nestin    | 14 d | method | suture-occluded      |
| Tao J et al <sup>156</sup>  | 2016 | cerebral ischemia | SD rats         | M | 10%chloral hydrate | EA | rol | BDNF      | 3 d  | method | suture-occluded      |
| Tao J et al <sup>156</sup>  | 2016 | cerebral ischemia | SD rats         | M | 10%chloral hydrate | EA | rol | GFAP      | 3 d  | method | suture-occluded      |
| Zhang SL <sup>53</sup>      | 2016 | cerebral ischemia | SPF rats        | M | NR                 | EA | rol | Ang-1     | 14 d | method | suture-occluded      |
| Zhang SL <sup>53</sup>      | 2016 | cerebral ischemia | SPF rats        | M | NR                 | EA | rol | VEGF      | 3 d  | method | suture-occluded      |
| Chen C et al <sup>70</sup>  | 2015 | cerebral ischemia | SPF rats        | M | NR                 | EA | rol | NGF       | NR   | method | suture-occluded      |
| Li HL <sup>31</sup>         | 2015 | cerebral ischemia | SPF rats        | M | 10%chloral hydrate | EA | rol | PSD-95    | 3 d  | method | suture-occluded      |
| Li QP et al <sup>25</sup>   | 2015 | cerebral ischemia | SD rats         | M | 10%chloral hydrate | EA | rol | SYN       | 7 d  | method | suture-occluded      |
| Li QP et al <sup>25</sup>   | 2015 | cerebral ischemia | SD rats         | M | 10%chloral hydrate | EA | rol | VEGF      | 14 d | method | suture-occluded      |

|                              |      |          |             |   |                        |    |     |           |      |        |                      |
|------------------------------|------|----------|-------------|---|------------------------|----|-----|-----------|------|--------|----------------------|
|                              |      |          |             |   |                        |    |     |           |      |        | suture-              |
|                              |      | cerebral |             | N |                        |    |     | cont      |      |        | occluded             |
| Li XJ et al <sup>98</sup>    | 2015 | ischemia | SPF rats    | R | 10%chloral hydrate     | EA | rol | BDNF      | 7 d  | method |                      |
|                              |      |          |             |   |                        |    |     |           |      |        | suture-              |
| Wang J et al <sup>59</sup>   | 2015 | ischemia | SPF rats    | M | 10%chloral hydrate     | EA | rol | VEGF      | 8 d  | method | occluded             |
|                              |      |          |             |   |                        |    |     |           |      |        | suture-              |
| Wang L <sup>60</sup>         | 2015 | ischemia | SPF rats    | M | 10%chloral hydrate     | EA | rol | VEGF      | NR   | method | occluded             |
|                              |      |          |             |   |                        |    |     |           |      |        | suture-              |
| Xiang F <sup>61</sup>        | 2015 | ischemia | SPF rats    | M | NR                     | EA | rol | VEGF      | 14 d | method | occluded             |
|                              |      |          |             |   |                        |    |     |           |      |        | suture-              |
| Yu JH et al <sup>110</sup>   | 2015 | ischemia | SD rats     | M | 10%chloral hydrate     | EA | rol | BDNFmR-NA | 21 d | method | occluded             |
|                              |      |          |             |   |                        |    |     |           |      |        | suture-              |
| Zhao JH et al <sup>40</sup>  | 2015 | ischemia | SPF rats    | M | 3%sodium pentobarbital | EA | rol | GFAP      | 14 d | method | occluded             |
|                              |      |          |             |   |                        |    |     |           |      |        | suture-              |
| Zhu YH et al <sup>69</sup>   | 2015 | ischemia | SD rats     | M | NR                     | EA | rol | VEGFmR-NA | 7 d  | method | occluded             |
|                              |      |          |             |   |                        |    |     |           |      |        | suture-              |
| Chen B et al <sup>41</sup>   | 2014 | ischemia | SD rats     | M | 10%chloral hydrate     | EA | rol | Nestin    | 7 d  | method | occluded             |
|                              |      |          |             |   |                        |    |     |           |      |        | suture-              |
| Cheng CY et al <sup>94</sup> | 2014 | ischemia | SD rats     | M | chloral hydrate        | EA | rol | BDNF      | 3 d  | method | occluded             |
|                              |      |          |             |   |                        |    |     |           |      |        | suture-              |
| Li J et al <sup>64</sup>     | 2014 | ischemia | Wistar rats | M | /F NR                  | EA | rol | VEGFmR-NA | 7 d  | method | occluded             |
|                              |      |          |             |   |                        |    |     |           |      |        | suture-              |
| Liu D et al <sup>100</sup>   | 2014 | ischemia | Wistar rats | M | 10%chloral hydrate     | EA | rol | BDNF      | 2 m  | method | two-vessel occlusion |
|                              |      |          |             |   |                        |    |     |           |      |        | suture-              |
| Liu Y et al <sup>101</sup>   | 2014 | ischemia | SPF rats    | M | NR                     | EA | rol | BDNF      | 14 d | method | occluded             |
|                              |      |          |             |   |                        |    |     |           |      |        | suture-              |
| Luo D et al <sup>42</sup>    | 2014 | ischemia | SD rats     | M | 10%chloral hydrate     | EA | rol | Nestin    | 7 d  | method | occluded             |



|                              |      |                   |             |   |                        |    |     |             |      |        |                 |
|------------------------------|------|-------------------|-------------|---|------------------------|----|-----|-------------|------|--------|-----------------|
|                              |      |                   |             |   |                        |    |     |             |      |        | suture-         |
| Luo D et al <sup>42</sup>    | 2014 | cerebral ischemia | SD rats     | M | 10%chloral hydrate     | EA | rol | Nestinm-RNA | 3 d  | method | occluded        |
| Qin B et al <sup>21</sup>    | 2014 | cerebral ischemia | Wistar rats | M | 1%sodium pentobarbital | EA | rol | GAP-43      | 14 d | method | suture-occluded |
| Tao J <sup>96</sup>          | 2014 | cerebral ischemia | SD rats     | M | 10%chloral hydrate     | EA | rol | Nestin      | 7 d  | method | suture-occluded |
| Xie CC <sup>68</sup>         | 2014 | cerebral ischemia | SPF-SD rats | M | 10%chloral hydrate     | EA | rol | VEGFmR-NA   | 7 d  | method | suture-occluded |
| Ye XQ et al <sup>107</sup>   | 2014 | cerebral ischemia | SPF rats    | M | chloral hydrate        | EA | rol | BDNF        | 3 d  | method | suture-occluded |
| Ye XQ et al <sup>107</sup>   | 2014 | cerebral ischemia | SPF rats    | M | chloral hydrate        | EA | rol | BDNFmR-NA   | 3 d  | method | suture-occluded |
| Zhang YG et al <sup>38</sup> | 2014 | cerebral ischemia | SD rats     | M | 3%sodium pentobarbital | EA | rol | GFAP        | 14 d | method | suture-occluded |
| Zhang YG et al <sup>38</sup> | 2014 | cerebral ischemia | SD rats     | M | 3%sodium pentobarbital | EA | rol | Nestin      | 7 d  | method | suture-occluded |
| Han YS <sup>17</sup>         | 2013 | cerebral ischemia | SD rats     | M | 6%chloral hydrate      | EA | rol | GAP-43      | 14 d | method | suture-occluded |
| Han YS <sup>17</sup>         | 2013 | cerebral ischemia | SD rats     | M | 10%chloral hydrate     | EA | rol | SYN         | 7 d  | method | suture-occluded |
| Huang LJ et al <sup>55</sup> | 2013 | cerebral ischemia | SD rats     | M | /F NR                  | EA | rol | VEGF        | 6 h  | method | suture-occluded |
| Ma JX et al <sup>51</sup>    | 2013 | cerebral ischemia | Wistar rats | M | 3.5%chloral hydrate    | EA | rol | BDNF        | 24 h | method | suture-occluded |

|                                |      |                   |              |   |                        |    |     |           |      |        |                    |
|--------------------------------|------|-------------------|--------------|---|------------------------|----|-----|-----------|------|--------|--------------------|
| Ma JX et al <sup>51</sup>      | 2013 | cerebral ischemia | Wistar rats  | M | 3.5%chloral hydrate    | EA | rol | VEGFmR-NA | 24 h | method | suture-occluded    |
| Wei XY <sup>93</sup>           | 2013 | cerebral ischemia | SD rats      | M | 10%chloral hydrate     | EA | rol | bFGF      | 12 h | method | suture-occluded    |
| Xiao YC et al <sup>37</sup>    | 2013 | cerebral ischemia | SD rats      | M | 10%chloral hydrate     | EA | rol | GFAP      | 14 d | method | suture-occluded    |
| Xu L et al <sup>22</sup>       | 2013 | cerebral ischemia | SD rats      | M | 6%chloral hydrate      | EA | rol | GAP-43    | 14 d | method | electrocoagulation |
| Xu L et al <sup>22</sup>       | 2013 | cerebral ischemia | SD rats      | M | 6%chloral hydrate      | EA | rol | VEGF      | 14 d | method | electrocoagulation |
| Zhang YK, Tao LF <sup>48</sup> | 2013 | cerebral ischemia | SD rats      | M | 10%chloral hydrate     | EA | rol | Nestin    | 14 d | method | suture-occluded    |
| Zhang YK, Tao LF <sup>48</sup> | 2013 | cerebral ischemia | SD rats      | M | 10%chloral hydrate     | EA | rol | VEGFmR-NA | 14 d | method | suture-occluded    |
| Zhao JX et al <sup>111</sup>   | 2013 | cerebral ischemia | Kunming mice | M | NR                     | EA | rol | BDNFmR-NA | 7 d  | NR     | suture-occluded    |
| Ding L et al <sup>90</sup>     | 2012 | cerebral ischemia | SD rats      | M | 10%chloral hydrate     | EA | rol | bFGF      | 24 h | method | suture-occluded    |
| Mao QJ, Chen BG <sup>66</sup>  | 2012 | cerebral ischemia | Wistar rats  | M | 3.5%chloral hydrate    | EA | rol | VEGFmR-NA | 2 d  | method | suture-occluded    |
| Shen F et al <sup>89</sup>     | 2012 | cerebral ischemia | SPF rats     | H | 10%chloral hydrate     | EA | rol | GDNF      | 72 h | method | suture-occluded    |
| Wang YC et al <sup>105</sup>   | 2012 | cerebral ischemia | SPF rats     | M | 10%chloral hydrate     | EA | rol | BDNF      | 14 d | method | suture-occluded    |
| Ye F et al <sup>45</sup>       | 2012 | cerebral ischemia | Wistar rats  | M | 2%sodium pentobarbital | EA | rol | Nestin    | 7 d  | method | suture-occluded    |

|                              |      |          |             |   |                     |    |      |            |      |      |            |
|------------------------------|------|----------|-------------|---|---------------------|----|------|------------|------|------|------------|
|                              |      |          |             |   |                     |    |      |            |      |      | electrocoa |
|                              |      | cerebral |             |   |                     |    | cont |            | 7 d  |      | gulation   |
| You HL <sup>46</sup>         | 2012 | ischemia | SD rats     | M | 10%chloral hydrate  | EA | rol  | Nestin     |      |      | method     |
|                              |      |          |             |   |                     |    |      |            |      |      | suture-    |
| Zhang XM <sup>54</sup>       | 2012 | ischemia | SPF rats    | M | 10%chloral hydrate  | EA | rol  | Ang-1      | 48 h |      | method     |
|                              |      |          |             |   |                     |    |      |            |      |      | suture-    |
| Zhang XM <sup>54</sup>       | 2012 | ischemia | SPF rats    | M | 10%chloral hydrate  | EA | rol  | VEGF       | 48 h |      | method     |
|                              |      |          |             |   |                     |    |      |            |      |      | suture-    |
| Zhang XM <sup>54</sup>       | 2012 | ischemia | SPF rats    | M | 10%chloral hydrate  | EA | rol  | VEGFmR-NA  | 48 h |      | method     |
|                              |      |          |             |   |                     |    |      |            |      |      | suture-    |
| Chen WS <sup>71</sup>        | 2011 | ischemia | SPF rats    | M | 10%chloral hydrate  | EA | rol  | NGF        | NR   |      | method     |
|                              |      |          |             |   |                     |    |      |            |      |      | suture-    |
| Liu D et al <sup>100</sup>   | 2011 | ischemia | Wistar rats | M | 10%chloral hydrate  | EA | rol  | GDNF       | 6 h  |      | method     |
|                              |      |          |             |   |                     |    |      |            |      |      | suture-    |
| Liu D et al <sup>100</sup>   | 2011 | ischemia | Wistar rats | M | 10%chloral hydrate  | EA | rol  | bFGF       | 72 h |      | method     |
|                              |      |          |             |   |                     |    |      |            |      |      | suture-    |
| Ma RR(1) et al <sup>19</sup> | 2011 | ischemia | SD rats     | M | NR                  | EA | rol  | GAP-43     |      | 14 d | method     |
|                              |      |          |             |   |                     |    |      |            |      |      | suture-    |
| Ma RR(1) et al <sup>19</sup> | 2011 | ischemia | SD rats     | M | NR                  | EA | rol  | GAP-43mRNA |      | 7 d  | method     |
|                              |      |          |             |   |                     |    |      |            |      |      | suture-    |
| Zhang HX et al <sup>47</sup> | 2011 | ischemia | Wistar rats | M | 10%chloral hydrate  | EA | rol  | Nestin     |      | 7 d  | method     |
|                              |      |          |             |   |                     |    |      |            |      |      | suture-    |
| Liu YN et al <sup>102</sup>  | 2010 | ischemia | SPF rats    | M | 10%chloral hydrate  | EA | rol  | BDNF       |      | 7 d  | method     |
|                              |      |          |             |   |                     |    |      |            |      |      | suture-    |
| Mi XJ <sup>20</sup>          | 2010 | ischemia | SD rats     | M | 3.5%chloral hydrate | EA | rol  | BDNF       |      | 14 d | method     |



|                           |      |                   |             |    |                      |    |      |                                |      |          |                    |
|---------------------------|------|-------------------|-------------|----|----------------------|----|------|--------------------------------|------|----------|--------------------|
|                           |      |                   |             |    |                      |    |      |                                |      |          | suture-occluded    |
| Shen GY <sup>52</sup> .   | 2009 | cerebral ischemia | SD rats     | /F | 10%chloral hydrate   | EA | rol  | VEGF                           | 24 h | method   | method             |
|                           |      |                   | SPF         |    |                      |    |      |                                |      |          | electrocoagulation |
| Chen LR <sup>11</sup> .   | 2008 | cerebral ischemia | wistar rats | M  | 10%chloral hydrate   | EA | rol  | PSD thickness                  | 14 d | method   | method             |
|                           |      |                   | SPF         |    |                      |    |      |                                |      |          | heat-coagulation   |
| Chen LR <sup>11</sup>     | 2008 | cerebral ischemia | wistar rats | M  | 10%chloral hydrate   | EA | rol  | Synaptic cleft width           | 12 h | n method | n method           |
|                           |      |                   | SPF         |    |                      |    |      | Numberical density of Synapses |      |          | heat-coagulation   |
| Du YX <sup>12</sup>       | 2008 | cerebral ischemia | wistar rats | M  | 10%chloral hydrate   | EA | rol  | Synapses                       | 7 d  | n method | n method           |
|                           |      |                   | SPF         |    |                      |    |      | Numberical density of Synapses |      |          | electrocoagulation |
| Du YX <sup>12</sup>       | 2008 | cerebral ischemia | wistar rats | M  | 10%chloral hydrate   | EA | rol  | Synapses                       | 7 d  | method   | method             |
|                           |      |                   | SPF         |    |                      |    |      |                                |      |          | electrocoagulation |
| Du YX <sup>12</sup>       | 2008 | cerebral ischemia | wistar rats | M  | 10%chloral hydrate   | EA | rol  | PSD thickness                  | 7 d  | method   | method             |
|                           |      |                   | SPF         |    |                      |    |      |                                |      |          | electrocoagulation |
| Du YX <sup>12</sup>       | 2008 | cerebral ischemia | wistar rats | M  | 10%chloral hydrate   | EA | rol  | Synaptic cleft width           | 1 d  | method   | method             |
|                           |      |                   |             |    |                      |    |      |                                |      |          | electrocoagulation |
| Fan YS,                   |      | cerebral          |             | M  | 3%sodium             |    | cont |                                |      |          | gulation           |
| Luo Y <sup>76</sup>       | 2008 | cerebral ischemia | SPF rats    | /F | pentobarbital        | EA | rol  | NGF                            | 2 d  | method   | method             |
|                           |      |                   |             |    |                      |    |      |                                |      |          | suture-occluded    |
| Ma JX <sup>65</sup>       | 2008 | cerebral ischemia | Wistar rats | M  | 3.5% chloral hydrate | EA | rol  | Ang-1                          | 2 h  | method   | method             |
|                           |      |                   |             |    |                      |    |      |                                |      |          | suture-occluded    |
| Song YS,                  |      | cerebral          |             |    |                      |    | cont |                                |      |          | occluded           |
| Zhou MF <sup>34</sup>     | 2008 | cerebral ischemia | SD rats     | M  | 10%chloral hydrate   | EA | rol  | GFAP                           | 7 d  | method   | method             |
|                           |      |                   |             |    |                      |    |      |                                |      |          | suture-occluded    |
| Bao DP <sup>49</sup>      | 2007 | cerebral ischemia | Wistar rats | M  | 10%chloral hydrate   | EA | rol  | Nestinm-RNA                    | 28 d | method   | method             |
|                           |      |                   | SPF         |    |                      |    |      |                                |      |          | suture-occluded    |
| Yao G et al <sup>23</sup> | 2007 | cerebral ischemia | wistar rats | M  | NR                   | EA | rol  | GAP-43                         | 14 d | method   | method             |

|                                |      |                   |             |    |                        |    |     |                                 |      |          |            |
|--------------------------------|------|-------------------|-------------|----|------------------------|----|-----|---------------------------------|------|----------|------------|
|                                |      |                   |             |    |                        |    |     |                                 |      |          | suture-    |
| Zhou CL et al <sup>62</sup> .  | 2007 | cerebral ischemia | SD rats     | H  | 10%chloral hydrate     | EA | rol | VEGF                            | 8 d  | method   | occluded   |
|                                |      |                   |             |    |                        |    |     |                                 |      |          | thromboe   |
|                                |      |                   |             |    |                        |    |     |                                 |      |          | mbolic     |
| Fan YS <sup>91</sup>           | 2006 | cerebral ischemia | SPF rats    | /F | 3%sodium pentobarbital | EA | rol | bFGF                            | 2 d  | method   | suture-    |
|                                |      |                   |             |    |                        |    |     |                                 |      |          | occluded   |
| Han XH et al <sup>92</sup>     | 2006 | cerebral ischemia | Wistar rats | M  | 6%chloral hydrate      | EA | rol | bFGF                            | 6 d  | method   | suture-    |
|                                |      |                   |             |    |                        |    |     |                                 |      |          | occluded   |
| Jiang C <sup>50</sup>          | 2006 | cerebral ischemia | Wistar rats | /F | 10%urethane            | EA | rol | Nestinm-RNA                     | 7 d  | method   | suture-    |
|                                |      |                   |             |    |                        |    |     |                                 |      |          | occluded   |
| Jiang C <sup>50</sup>          | 2006 | cerebral ischemia | Wistar rats | /F | 10%urethane            | EA | rol | NGF                             | 8 h  | method   | suture-    |
|                                |      |                   |             |    |                        |    |     |                                 |      |          | occluded   |
| Jiang HZ et al <sup>63</sup> . | 2006 | cerebral ischemia | SD rats     | M  | 6%chloral hydrate      | EA | rol | VEGFmR-NA                       | 72 h | method   | photoche   |
|                                |      |                   |             |    |                        |    |     |                                 |      |          | mical      |
|                                |      |                   |             |    |                        |    |     |                                 |      |          | suture-    |
| Shen F <sup>83</sup>           | 2006 | cerebral ischemia | SD rats     | /F | 10%chloral hydrate     | EA | rol | NGF                             | 72 h | method   | occluded   |
|                                |      |                   |             |    |                        |    |     |                                 |      |          | heat-      |
|                                |      |                   |             |    |                        |    |     |                                 |      |          | coagulatio |
| Yi W et al <sup>85</sup>       | 2006 | cerebral ischemia | SD rats     | H  | 10%chloral hydrate     | EA | rol | NGF                             | 14 d | n method | suture-    |
|                                |      |                   |             |    |                        |    |     |                                 |      |          | occluded   |
| Bai MH <sup>87</sup>           | 2005 | cerebral ischemia | SD rats     | /F | 10%chloral hydrate     | EA | rol | GDNF                            | 72 h | method   | suture-    |
|                                |      |                   |             |    |                        |    |     |                                 |      |          | occluded   |
| Bai MH <sup>87</sup>           | 2005 | cerebral ischemia | SD rats     | /F | 10%chloral hydrate     | EA | rol | bFGF                            | 72 h | method   | heat-      |
|                                |      |                   |             |    |                        |    |     |                                 |      |          | coagulatio |
| Ji Z <sup>77</sup>             | 2005 | cerebral ischemia | Wistar rats | M  | sodium pentobarbital   | EA | rol | NGF                             | 10 h | n method | suture-    |
|                                |      |                   |             |    |                        |    |     |                                 |      |          | occluded   |
|                                |      |                   |             |    |                        |    |     |                                 |      |          | heat-      |
| Wang GB et al <sup>15</sup>    | 2005 | cerebral ischemia | wistar rats | H  | 10%chloral hydrate     | EA | rol | Numberi-cal density of Synapses | 35 d | n method | coagulatio |

|                       |      |          |          |    |                    |    |      |               |      |            |
|-----------------------|------|----------|----------|----|--------------------|----|------|---------------|------|------------|
|                       |      |          |          |    |                    |    |      | Numberi-cal   |      | heat-      |
| Wang GB               |      | cerebral |          |    |                    |    | cont | density of    |      | coagulatio |
| et al <sup>15</sup>   | 2005 | ischemia | SPF rats | H  | 10%chloral hydrate | EA | rol  | Synapses      | 14 d | n method   |
| Wang GB               |      | cerebral |          |    |                    |    | cont |               |      | heat-      |
| et al <sup>15</sup>   | 2005 | ischemia | SPF rats | H  | 10%chloral hydrate | EA | rol  | PSD thickness | 35 d | coagulatio |
|                       |      |          |          |    |                    |    |      |               |      | n method   |
|                       |      |          |          |    |                    |    |      |               |      | heat-      |
| Yin TR <sup>86</sup>  | 2005 | ischemia | SD rats  | /F | 10%chloral hydrate | EA | rol  | NGF           | 24 h | coagulatio |
|                       |      |          |          |    |                    |    |      |               |      | n method   |
|                       |      |          |          |    |                    |    |      |               |      | suture-    |
| Chen JJ <sup>24</sup> | 2004 | ischemia | rats     | /F | 10%chloral hydrate | EA | rol  | GAP-43mRNA    | 7 d  | occluded   |
|                       |      |          |          |    |                    |    |      |               |      | method     |
|                       |      |          |          |    |                    |    |      |               |      | suture-    |
| Chen JJ <sup>24</sup> | 2004 | ischemia | rats     | /F | 10%chloral hydrate | EA | rol  | Nestinm-RNA   | 7 d  | occluded   |
|                       |      |          |          |    |                    |    |      |               |      | method     |
|                       |      |          |          |    |                    |    |      |               |      | suture-    |
| Chen JJ <sup>24</sup> | 2004 | ischemia | rats     | /F | 10%chloral hydrate | EA | rol  | SYN           | 7 d  | occluded   |
|                       |      |          |          |    |                    |    |      |               |      | method     |
|                       |      |          |          |    |                    |    |      |               |      | suture-    |
| Liu B <sup>27</sup>   | 2004 | ischemia | rats     | M  | 20%urethane        | EA | rol  | SYN           | 7 d  | occluded   |
|                       |      |          |          |    |                    |    |      |               |      | method     |
|                       |      |          |          |    |                    |    |      |               |      | heat-      |
| Luo.Z.D.              | 2004 | ischemia | rats     | M  | 10%chloral hydrate | EA | rol  | NGF           | 10 h | coagulatio |
|                       |      |          |          |    |                    |    |      |               |      | n method   |
|                       |      |          |          |    |                    |    |      |               |      | heat-      |
| Xu,N.G.               | 2004 | ischemia | SPF rats | H  | 10%chloral hydrate | EA | rol  | BDNF          | 14 d | coagulatio |
|                       |      |          |          |    |                    |    |      |               |      | n method   |
|                       |      |          |          |    |                    |    |      |               |      | suture-    |
| Huang,X.F.            | 2002 | ischemia | rats     | M  | 10%chloral hydrate | EA | rol  | GAP-43        | 14 d | occluded   |
|                       |      |          |          |    |                    |    |      |               |      | method     |
|                       |      |          |          |    |                    |    |      |               |      | heat-      |
| Luo ZD et             |      | cerebral | Wistar   |    |                    |    | cont |               |      | coagulatio |
| al <sup>79</sup>      | 2002 | ischemia | rats     | M  | 10%chloral hydrate | EA | rol  | BDNF          | 10 h | n method   |
| Chen YH,              |      |          |          |    |                    |    |      |               |      | suture-    |
| Huang                 |      | cerebral | Wistar   |    |                    |    | cont |               |      | occluded   |
| XF <sup>72</sup> .    | 2000 | ischemia | rats     | M  | 10%chloral hydrate | EA | rol  | NGF           | 8 h  | method     |

|                          |      |          |          |   |                      |    |     |            |      |      |          |
|--------------------------|------|----------|----------|---|----------------------|----|-----|------------|------|------|----------|
|                          |      |          |          |   |                      |    |     |            |      |      | suture-  |
| Chen YH,                 |      | cerebral | Wistar   |   |                      |    |     | cont       |      |      | occluded |
| Huang XF <sup>72</sup>   | 2000 | ischemia | rats     | M | 10%chloral hydrate   | EA | rol | BDNF       | 8 h  |      | method   |
| Chen YH,                 |      |          |          |   |                      |    |     |            |      |      | suture-  |
| Huang                    |      | cerebral | Wistar   |   |                      |    |     | cont       |      |      | occluded |
| XF <sup>72</sup> .       | 2000 | ischemia | rats     | M | 10%chloral hydrate   | EA | rol | BDNF       | 7 d  |      | method   |
|                          |      |          |          |   |                      |    |     |            |      |      | suture-  |
| Cao XL et                |      | cerebral |          |   |                      |    |     | cont       |      | 14 d | occluded |
| al <sup>16</sup>         | 2018 | ischemia | SD rats  | M | 10%chloral hydrate   | EA | rol | GAP-43     |      |      | method   |
|                          |      |          |          |   |                      |    |     |            |      |      | suture-  |
| Cao XL et                |      | cerebral |          |   |                      |    |     | cont       |      | 7 d  | occluded |
| al <sup>16</sup>         | 2018 | ischemia | SD rats  | M | 10%chloral hydrate   | EA | rol | GAP-43mRNA |      |      | method   |
|                          |      |          |          |   |                      |    |     |            |      |      | suture-  |
| Ding J et                |      | cerebral |          |   |                      |    |     | cont       |      |      | occluded |
| al <sup>74</sup>         | 2018 | ischemia | SD rats  | M | sodium pentobarbital | EA | rol | NGF        | 21 d |      | method   |
|                          |      |          |          |   |                      |    |     |            |      |      | suture-  |
| Duan XD et               |      | cerebral |          |   | 1% pentobarbital     |    |     | cont       |      |      | occluded |
| al <sup>75</sup>         | 2018 | ischemia | SPF rats | M | sodium               | EA | rol | NGF        | 14 d |      | method   |
|                          |      |          |          |   |                      |    |     |            |      |      | suture-  |
| Duan XD et               |      | cerebral |          |   | 1% pentobarbital     |    |     | cont       |      |      | occluded |
| al <sup>75</sup>         | 2018 | ischemia | SPF rats | M | sodium               | EA | rol | BDNF       | 14 d |      | method   |
|                          |      |          |          |   |                      |    |     |            |      |      | suture-  |
| Liu L,                   |      | cerebral |          |   |                      |    |     | cont       |      |      | occluded |
| Zhang XQ <sup>78</sup>   | 2018 | ischemia | SD rats  | M | 10%chloral hydrate   | EA | rol | NGF        | 7 d  |      | method   |
|                          |      |          |          |   |                      |    |     |            |      |      | suture-  |
| Li QL et                 |      | cerebral |          |   |                      |    |     | cont       |      |      | occluded |
| al <sup>56</sup>         | 2018 | ischemia | SPF rats | M | 3.5%chloral hydrate  | EA | rol | VEGF       | 7 d  |      | method   |
|                          |      |          |          |   |                      |    |     |            |      |      | suture-  |
| Li QL et                 |      | cerebral |          |   |                      |    |     | cont       |      |      | occluded |
| al <sup>56</sup>         | 2018 | ischemia | SPF rats | M | 3.5%chloral hydrate  | EA | rol | VEGFmR-NA  | 7 d  |      | method   |
|                          |      |          |          |   |                      |    |     |            |      |      | suture-  |
|                          |      | cerebral | Wistar   |   |                      |    |     | cont       |      |      | occluded |
| Ma Y et al <sup>81</sup> | 2018 | ischemia | rats     | H | 10%chloral hydrate   | EA | rol | NGF        | 7 d  |      | method   |
|                          |      |          |          |   |                      |    |     |            |      |      | suture-  |
|                          |      | cerebral |          |   |                      |    |     | cont       |      |      | occluded |
| Song CM <sup>28</sup>    | 2018 | ischemia | SD rats  | M | 10%chloral hydrate   | EA | rol | SYN        | 8 d  |      | method   |



|                             |      |                   |             |   |                        |    |     |           |      |          |
|-----------------------------|------|-------------------|-------------|---|------------------------|----|-----|-----------|------|----------|
|                             |      |                   |             |   |                        |    |     |           |      | suture-  |
| Tan F et al <sup>44</sup>   | 2018 | cerebral ischemia | SD rats     | M | 5%isoflurane           | EA | rol | Nestin    | 7 d  | method   |
|                             |      |                   |             |   |                        |    |     |           |      | suture-  |
| Wang MP et al <sup>67</sup> | 2018 | cerebral ischemia | Wistar rats | M | 10%chloral hydrate     | EA | rol | VEGFmR-NA | 7 d  | method   |
|                             |      |                   |             |   |                        |    |     |           |      | suture-  |
| Wang S et al <sup>104</sup> | 2018 | cerebral ischemia | SD rats     | M | NR                     | EA | rol | BDNF      | 14 d | method   |
|                             |      |                   |             |   |                        |    |     |           |      | suture-  |
| Yang MG et al <sup>29</sup> | 2018 | cerebral ischemia | SPF rats    | M | 10%chloral hydrate     | EA | rol | SYN       | 7 d  | method   |
|                             |      |                   |             |   |                        |    |     |           |      | suture-  |
| Zhao HJ et al <sup>39</sup> | 2018 | cerebral ischemia | Wistar rats | M | 10%chloral hydrate     | EA | rol | GFAP      | 14 d | method   |
|                             |      |                   |             |   |                        |    |     |           |      | suture-  |
| Ding J et al <sup>73</sup>  | 2017 | cerebral ischemia | SD rats     | M | 1%sodium pentobarbital | EA | rol | NGF       | 21 d | method   |
|                             |      |                   |             |   |                        |    |     |           |      | suture-  |
|                             |      |                   |             |   |                        |    |     |           |      | occluded |
| Lin R et al <sup>33</sup>   | 2017 | cerebral ischemia | SD rats     | M | 10%chloral hydrate     | EA | rol | BDNF      | 7 d  | method   |

Notes: SD rats: Sprague-Dawley rats; H: half male and half female; SPF rats: specific-pathogen-free wistar rats; M/F: male and female, with no restrictions on the sex ratio; control: the ischemia control group; NR: not reported; PSD: postsynaptic density; Nv: synaptic numerical density; Sv: synaptic surface density; GAP-43: growth-associated protein-43; SYN: synaptophysin; GFAP: glial fibrillary acidic protein; ANG-1: angiotensin-1; VEGF: vascular endothelial growth factor; NGF: nerve growth factor; GDNF: glial cell line-derived neurotrophic factor; bFGF: basic fibroblast growth factor; BDNF: brain-derived neurotrophic factor.

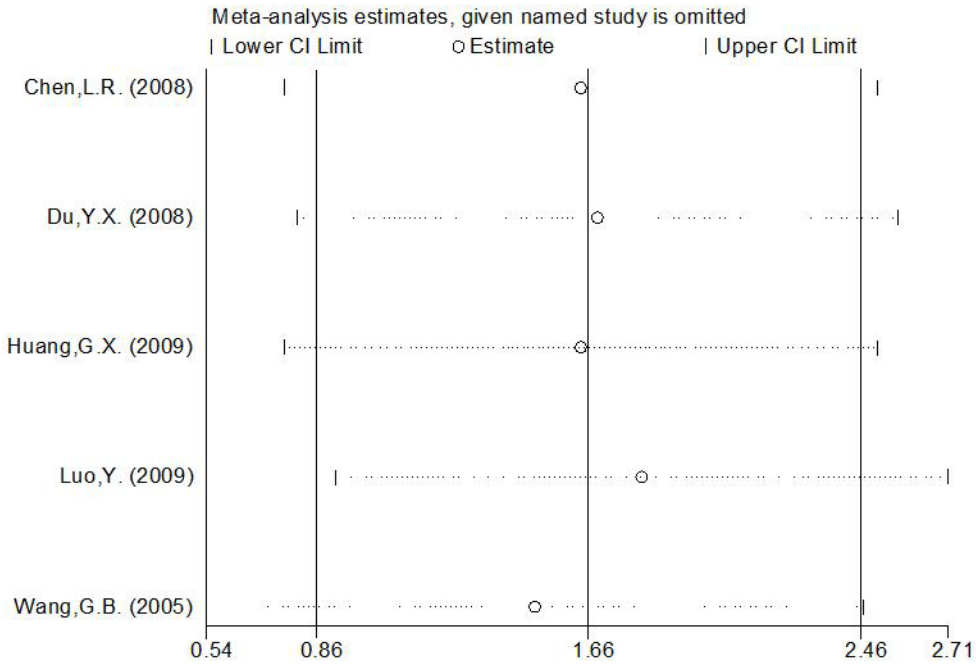

Supplementary Figure 1 Sensitivity analysis of included studies of PSD thickness  
 PSD: postsynaptic density; CI: confidence interval.

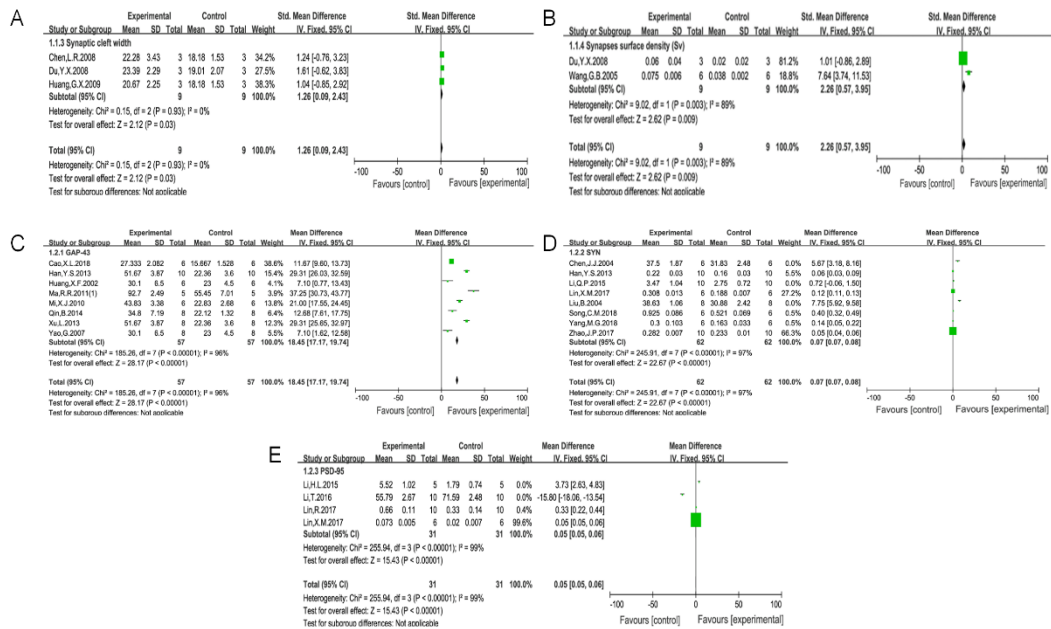

Supplementary Figure 2 Forest plot of the effects of EA on Synaptic plasticity

A: forest plot of the effects of EA on Synaptic cleft width; B: forest plot of the effects of EA on Synaptic surface density; C: forest plot of the effects of EA on GAP-43; D: forest plot of the effects of EA on SYN; E: forest plot of the effects of EA on PSD-95. GAP-43: growth-associated protein-43; SYN: synaptophysin; PSD: postsynaptic density; EA: electroacupuncture; CI: confidence interval; IV: inverse variance; SD: standard deviation.

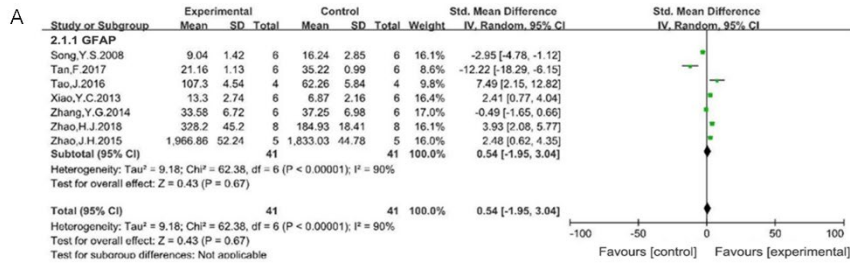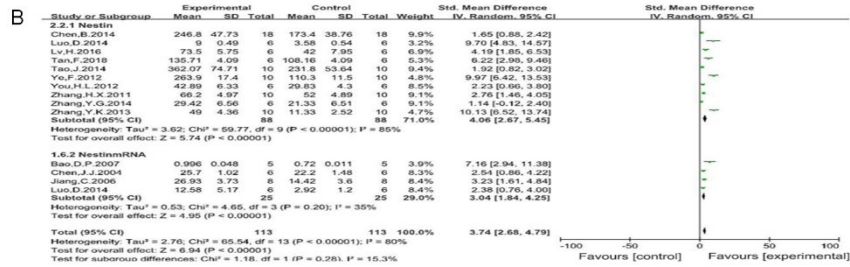

Supplementary Figure 3 Forest plot of the effects of EA on Neurogenesis

A: forest plot of the effects of EA on GFAP; B: forest plot of the effects of EA on Nestin and NestinmRNA; GFAP: glial fibrillary acidic protein; EA: electroacupuncture; CI: confidence interval; IV: inverse variance; SD: standard deviation.

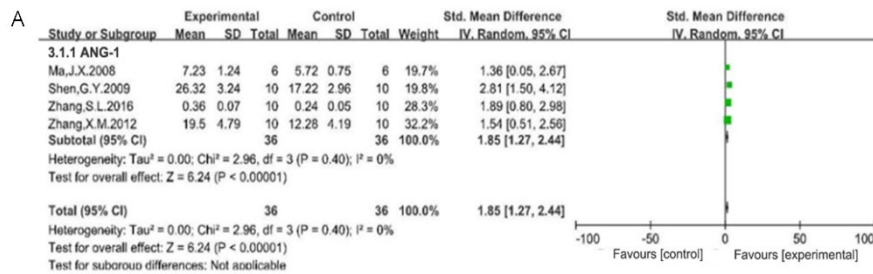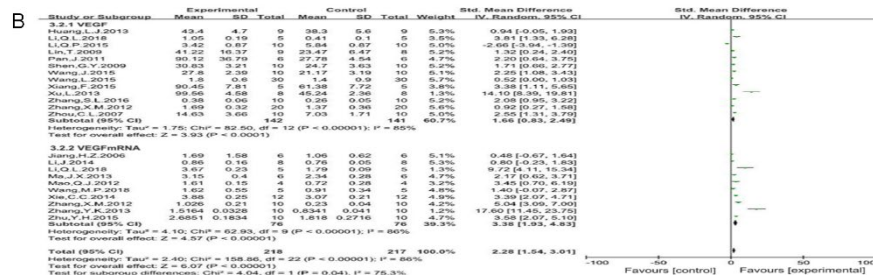

Supplementary Figure 4 Forest plot of the effects of EA on Angiogenesis

A: forest plot of the effects of EA on ANG-1; B: forest plot of the effects of EA on VEGF and VEGFmRNA; ANG-1: angiopoietin-1; VEGF: vascular endothelial growth factor; EA: electroacupuncture; CI: confidence interval; IV: inverse variance; SD: standard deviation.

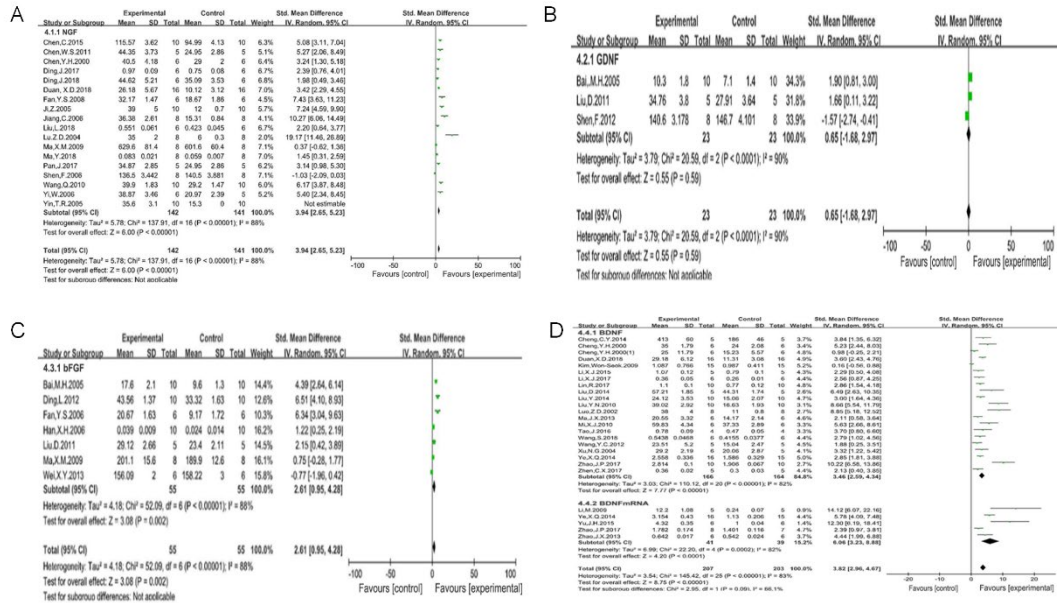

Supplementary Figure 5 Forest plot of the effects of EA on Neurotrophins

A: forest plot of the effects of EA on NGF; B: forest plot of the effects of EA on GDNF; C: forest plot of the effects of EA on bFGF; D: forest plot of the effects of EA on BDNF and BDNFmRNA. NGF: nerve growth factor; GDNF: glial cell line-derived neurotrophic factor; bFGF: basic fibroblast growth factor; BDNF: brain-derived neurotrophic factor; EA: electroacupuncture; CI: confidence interval; IV: inverse variance; SD: standard deviation.
